# Supplementary material
Source: PubMed Central journal article supplement (PMC9892740)
Supplement: jcsm.10298.sm001.pdf [file jcsm.10298.sm001.pdf]

**Table S1**—Search strategy.

| #  | Query                                                                                                                                                  |
|----|--------------------------------------------------------------------------------------------------------------------------------------------------------|
| 1  | (Obstructive sleep apnea or obstructive sleep apnoea*).mp. [mp=ti, ot, ab, sh, hw, kw, tx, ct, tn, dm, mf, dv, fx, dq, nm, kf, ox, px, rx, an, ui, sy] |
| 2  | (Polysomnogram or sleep study).mp.                                                                                                                     |
| 3  | Metric*.mp.                                                                                                                                            |
| 4  | Heart rate variability.mp.                                                                                                                             |
| 5  | Pulse transit time.mp.                                                                                                                                 |
| 6  | K-complex.mp.                                                                                                                                          |
| 7  | Cardiopulmonary coupling.mp.                                                                                                                           |
| 8  | Hypoxic burden.mp.                                                                                                                                     |
| 9  | ("Odds ratio product" or "ORP").mp.                                                                                                                    |
| 10 | Pulse oximetry data.mp.                                                                                                                                |
| 11 | Arousal intensity.mp.                                                                                                                                  |
| 12 | Cyclic alternating patterns.mp.                                                                                                                        |
| 13 | Respiration features.mp.                                                                                                                               |
| 14 | Inspiratory flow shape.mp.                                                                                                                             |
| 15 | Sleep EEG power.mp.                                                                                                                                    |
| 16 | Sleep spindles density.mp.                                                                                                                             |
| 17 | Event duration.mp.                                                                                                                                     |
| 18 | 3 or 4 or 5 or 6 or 7 or 8 or 9 or 10 or 11 or 12 or 13 or 14 or 15 or 16 or 17                                                                        |
| 19 | 1 and 2 and 18 (EMBASE, MEDLINE, and the Cochrane Database)                                                                                            |
| 20 | Limit 19 to year="2000 - Current"                                                                                                                      |
